# Supplementary material
Source: Royal Society of Chemistry journal article supplement (doi:10.1039/d6em00140h)
Supplement: d6em00140h1.pdf [file d6em00140h1.pdf]

## **Brown carbon is a significant contributor to aerosol climate forcing in the northwestern Himalayas**

Rahul Kant Yadav<sup>a,#</sup>, Aditi Rana<sup>a,#</sup>, Rajdeep Singh<sup>b</sup>, Harish C. Phuleria<sup>b</sup>, Sayantan Sarkar<sup>a\*</sup>

<sup>a</sup>School of Civil and Environmental Engineering, Indian Institute of Technology (IIT) Mandi, Kamand, Himachal Pradesh 175005, India.

<sup>b</sup>Environmental Science and Engineering Department, and Centre for Climate Studies, Indian Institute of Technology Bombay (IIT), Mumbai, Maharashtra 400076, India

<sup>#</sup>these authors contributed equally

\*Corresponding author at: Room No. A11-05-38, Indian Institute of Technology (IIT) Mandi, Kamand, Himachal Pradesh 175005, India; Email: [sayantan@iitmandi.ac.in](mailto:sayantan@iitmandi.ac.in)

### **Supplementary information**

**Contains 23 pages, 7 tables and 9 figures**

## **1. Methodological details**

### **1.1 Aerosol neutralization factor (Nf)**

The neutralization factor (Eq. S1) identifies the major neutralizing agent in the study area and is calculated as below.

$$Nf = \frac{[cation]}{[SO_4^{2-}] + [NO_3^-]}$$

(S1)

Neutralisation factor of cations for all seasons is given in Table S5.

### **1.2 PMF data preparation, choice of factors and error estimation**

Outliers beyond three standard deviations for each species were excluded. The signal-to-noise ratios for each input variable exceeded 3, and consequently all variables were

categorized as “strong” in the initial analysis. The sum of all variables was termed the “total variable” and was considered “weak”. The dataset was tested for PMF solutions ranging from 2 to 10 factors, with each run being repeated 20 times. The final number of factors was chosen based on how interpretable each solution was, the variation in  $Q/Q_{\text{exp}}$  with different factor numbers, and result of robustness assessments.  $Q/Q_{\text{exp}}$  values consistently decreased without reaching a minimum for 2-10 factor runs. From the analysis of residuals of the initial runs, variables with scaled residuals outside  $\pm 3$  that adversely affected the results were labelled as "weak." Factor solutions were then re-run and it was observed that the rate of decline in  $Q/Q_{\text{exp}}$  reduced beyond the 4-factor solution, and factor profiles were split from the 5-factor solution onwards. In the 4-factor solution, the regression coefficient ( $R^2$ ) for the modelled versus observed total variable was 0.98, suggesting strong model performance. This solution was thus considered optimal for the dataset based on these findings and the physical interpretation of source profiles. The stability of  $Q$  for the 4-factor solution was assessed through 20 iterations with random seeds. Rotational ambiguity was examined using the  $F_{\text{peak}}$  function, by testing  $F_{\text{peak}}$  values from -0.5 to +1.5 in 0.5 increments for the 4-factor solution. The  $Q/Q_{\text{exp}}$  and  $Q_{\text{robust}}/Q_{\text{true}}$  reached clear minima at  $F_{\text{peak}} = -0.5$  ( $dQ = 6.6\%$ ), leading to the selection of this  $F_{\text{peak}}$  value for rotation application. Two error estimation methods, displacement (DISP) and bootstrapping (BS), were applied to the PMF solution. No factor swaps were detected in DISP for  $dQ_{\text{max}}=4, 8, 15, \text{ and } 25$ , suggesting that the stability of the PMF solution was acceptable. A total of 100 BS runs were conducted with a minimum correlation coefficient criterion of 0.6. For both the base factor and  $F_{\text{peak}}$  factor solutions, 90-100% of BS factors corresponded to base/ $F_{\text{peak}}$  factors, demonstrating the solution's robustness (Table S2).

**Table S1.** Seasonal averages of temperature, relative humidity, wind speed, and wind direction during the study period.

| Parameter                          | Summer            | Post-monsoon     | Winter           |
|------------------------------------|-------------------|------------------|------------------|
| Wind speed ( $\text{m s}^{-1}$ )   | $4.1 \pm 0.6$     | $4.5 \pm 1.3$    | $2.3 \pm 0.3$    |
| Wind direction (degree)            | $180.1 \pm 105.8$ | $150.1 \pm 97.4$ | $154.8 \pm 88.2$ |
| RH (%)                             | $73.6 \pm 9.5$    | $75.0 \pm 12.0$  | $69.2 \pm 13.1$  |
| Temperature ( $^{\circ}\text{C}$ ) | $21.2 \pm 4.5$    | $19.1 \pm 5.1$   | $8.0 \pm 1.8$    |

**Table S2.** Diagnostics of error estimation from BS mapping and DISP for the base run, and BS mapping for the  $F_{\text{peak}}$  run.

| <b>BS Mapping: (<math>R \geq 0.6</math>)</b><br>(Base run)          |            | Crustal                                   | Secondary | Biomass | Fossil fuel | Unmapped |
|---------------------------------------------------------------------|------------|-------------------------------------------|-----------|---------|-------------|----------|
| Crustal                                                             |            | 100                                       | 0         | 0       | 0           | 0        |
| Secondary                                                           |            | 2                                         | 78        | 17      | 3           | 0        |
| Biomass                                                             |            | 0                                         | 0         | 97      | 3           | 0        |
| Fossil fuel                                                         |            | 0                                         | 1         | 0       | 99          | 0        |
| <b>DISP Diagnostics</b><br>(Base run)                               |            | Error code: 0<br>Largest Decrease in Q: 0 |           |         |             |          |
| Factor Swaps                                                        | dQmax = 4  | 0                                         | 0         | 0       |             |          |
|                                                                     | dQmax = 8  | 0                                         | 0         | 0       |             |          |
|                                                                     | dQmax = 15 | 0                                         | 0         | 0       |             |          |
|                                                                     | dQmax = 25 | 0                                         | 0         | 0       |             |          |
| <b>BS Mapping: (<math>R \geq 0.6</math>)</b><br>(Fpeak value: -0.5) |            | Crustal                                   | Secondary | Biomass | Fossil fuel | Unmapped |
| Crustal                                                             |            | 100                                       | 0         | 0       | 0           | 0        |
| Secondary                                                           |            | 0                                         | 97        | 3       | 0           | 0        |
| Biomass                                                             |            | 0                                         | 0         | 99      | 1           | 0        |
| Fossil fuel                                                         |            | 0                                         | 0         | 0       | 100         | 0        |

**Table S3.** Sensitivity analysis of Relative Radiative Forcing with changing planetary boundary layer (PBL) height and mass absorption efficiency (MAE) of elemental carbon (EC).

| <b>MAE (<math>\text{m}^2 \text{g}^{-1}</math>)</b> | <b>% Change</b> |            |             |
|----------------------------------------------------|-----------------|------------|-------------|
|                                                    | 300-400 nm      | 300-700 nm | 300-2500 nm |
| <b>6</b>                                           | 24.8            | 24.9       | 24.9        |
| <b>6.5</b>                                         | 15.3            | 15.3       | 15.3        |
| <b>7</b>                                           | 7.1             | 7.1        | 7.1         |
| <b>7.5</b>                                         | 0.0             | 0.0        | 0.0         |
| <b>8</b>                                           | -6.2            | -6.2       | -6.2        |
| <b>8.5</b>                                         | -11.7           | -11.7      | -11.7       |
| <b>9</b>                                           | -16.5           | -16.6      | -16.6       |
| <b>PBL (m)</b>                                     | <b>% Change</b> |            |             |
|                                                    | 300-400 nm      | 300-700 nm | 300-2500 nm |
| <b>700</b>                                         | -0.17           | -0.13      | -0.11       |
| <b>800</b>                                         | -0.11           | -0.09      | -0.07       |
| <b>900</b>                                         | -0.06           | -0.04      | -0.04       |
| <b>1000</b>                                        | 0.00            | 0.00       | 0.00        |
| <b>1100</b>                                        | 0.06            | 0.04       | 0.04        |

|             |      |      |      |
|-------------|------|------|------|
| <b>1200</b> | 0.11 | 0.09 | 0.07 |
| <b>1300</b> | 0.17 | 0.13 | 0.11 |

**Table**

**S4. POC**

| Season       | Method                 | POC ( $\mu\text{g m}^{-3}$ ) | SOC ( $\mu\text{g m}^{-3}$ ) |
|--------------|------------------------|------------------------------|------------------------------|
| Summer       | (OC/EC) <sub>min</sub> | 1.96 ± 0.7                   | 3.19 ± 0.1                   |
|              | Regression             | 2.17 ± 0.8                   | 2.9 ± 1.0                    |
|              | MRS                    | 1.5 ± 0.6                    | 3.6 ± 1.0                    |
| Post-Monsoon | (OC/EC) <sub>min</sub> | 3.4 ± 1.24                   | 2.9 ± 0.7                    |
|              | Regression             | 4.6 ± 1.7                    | 1.5 ± 0.8                    |
|              | MRS                    | 3.8 ± 1.4                    | 2.4 ± 0.8                    |
| Winter       | (OC/EC) <sub>min</sub> | 4.2 ± 1.7                    | 7.3 ± 3.7                    |
|              | Regression             | 8.6 ± 3.7                    | 2.6 ± 2.4                    |
|              | MRS                    | 9.8 ± 4.3                    | 1.5 ± 1.9                    |

estimates ( $\mu\text{g m}^{-3}$ ) using three methods: i) the (OC/EC)<sub>min</sub> method; ii) the regression-based (15<sup>th</sup> percentile method); and iii) the MRS method across seasons.

**Table S5.** Neutralisation factor (Nf) of cations.

| Nf                  | NH <sub>4</sub> <sup>+</sup> | K <sup>+</sup> | Ca <sup>2+</sup> | Mg <sup>2+</sup> |
|---------------------|------------------------------|----------------|------------------|------------------|
| <b>Summer</b>       | 1.00 ± 0.51                  | 0.33 ± 0.17    | 0.04 ± 0.02      | 0.09 ± 0.06      |
| <b>Post-monsoon</b> | 1.06 ± 0.29                  | 0.49 ± 0.30    | 0.42 ± 0.20      | 0.04 ± 0.02      |

---

|               |                 |                 |                 |                 |
|---------------|-----------------|-----------------|-----------------|-----------------|
| <b>Winter</b> | $0.58 \pm 0.37$ | $0.29 \pm 0.15$ | $0.21 \pm 0.15$ | $0.06 \pm 0.04$ |
|---------------|-----------------|-----------------|-----------------|-----------------|

---

**Table S6.** Summary of optical parameters of water-soluble and methanol-soluble brown carbon ( $\text{BrC}_{\text{aq}}$  and  $\text{BrC}_{\text{me}}$ ) reported for the Himalayan region. Here,  $b_{\text{abs}_{365}}$  is the absorption coefficient at 365 nm,  $\text{MAE}_{365}$  is the mass absorption efficiency at 365 nm, and AAE is the absorption Ångström exponent.

| Location        | Altitude | Region                                     | Season       | $\text{BrC}_{\text{aq}}$                       |                                                      |               | $\text{BrC}_{\text{me}}$                       |                                                      |               | Reference         |
|-----------------|----------|--------------------------------------------|--------------|------------------------------------------------|------------------------------------------------------|---------------|------------------------------------------------|------------------------------------------------------|---------------|-------------------|
|                 |          |                                            |              | $b_{\text{abs}_{365}}$<br>( $\text{Mm}^{-1}$ ) | $\text{MAE}_{365}$<br>( $\text{m}^2 \text{g}^{-1}$ ) | AAE           | $b_{\text{abs}_{365}}$<br>( $\text{Mm}^{-1}$ ) | $\text{MAE}_{365}$<br>( $\text{m}^2 \text{g}^{-1}$ ) | AAE           |                   |
| Qinghai lake    | 3200 m   |                                            | Monsoon      | $1.9 \pm 0.5$                                  | $1.6 \pm 0.7$                                        | 5.7           | $2.2 \pm 1.0$                                  | $0.7 \pm 0.3$                                        | 6             | Zhu et al., 2024  |
|                 |          |                                            | Post-monsoon | $2.8 \pm 1.2$                                  | $1.0 \pm 0.2$                                        | 5.7           | $4.1 \pm 2.3$                                  | $0.6 \pm 0.1$                                        | 6.6           |                   |
|                 |          |                                            | Winter       | $3.3 \pm 1.0$                                  | $1.5 \pm 0.3$                                        | 5.5           | $4.7 \pm 1.7$                                  | $0.7 \pm 0.2$                                        | 6.7           |                   |
|                 |          |                                            | Pre-monsoon  | $3.4 \pm 1.0$                                  | $1.4 \pm 0.6$                                        | 5.4           | $3.8 \pm 2.3$                                  | $0.7 \pm 0.2$                                        | 6             |                   |
| Ngari           | 4360 m   | Himalayas and Tibetan Plateau (HTP), China | Monsoon      | $2.5 \pm 1.9$                                  | $2.3 \pm 1.1$                                        | 5.7           | $3.7 \pm 4.7$                                  | $0.7 \pm 0.4$                                        | 6             |                   |
|                 |          |                                            | Post-monsoon | $4.6 \pm 2.5$                                  | $4.2 \pm 1.7$                                        | 6.3           | $12.0 \pm 16.4$                                | $1.2 \pm 0.9$                                        | 8.1           |                   |
|                 |          |                                            | Winter       | $5.4 \pm 1.7$                                  | $3.7 \pm 0.6$                                        | 6.5           | $9.2 \pm 8.7$                                  | $1.3 \pm 0.2$                                        | 7.9           |                   |
|                 |          |                                            | Pre-monsoon  | $2.7 \pm 1.0$                                  | $2.6 \pm 0.7$                                        | 6.2           | $3.4 \pm 1.5$                                  | $0.7 \pm 0.1$                                        | 6.1           |                   |
| Purang          | 3952 m   |                                            | Monsoon      | $1.2 \pm 0.4$                                  | $4.1 \pm 1.4$                                        | 6.5           | $2.7 \pm 2.0$                                  | $0.8 \pm 0.3$                                        | 6.6           |                   |
|                 |          |                                            | Post-monsoon | $2.0 \pm 0.5$                                  | $3.5 \pm 0.7$                                        | 5.6           | $2.9 \pm 0.6$                                  | $0.6 \pm 0.1$                                        | 4.9           |                   |
|                 |          |                                            | Winter       | $3.3 \pm 1.1$                                  | $4.6 \pm 0.9$                                        | 6.7           | $6.4 \pm 2.9$                                  | $1.0 \pm 0.1$                                        | 6.6           |                   |
|                 |          |                                            | Pre-monsoon  | $7.7 \pm 7.5$                                  | $4.1 \pm 1.0$                                        | 6.7           | $8.6 \pm 6.0$                                  | $0.8 \pm 0.1$                                        | 6.7           |                   |
| Beiluhe         | 4659 m   |                                            | Monsoon      | $0.6 \pm 0.0$                                  | 2.4                                                  | 4.6           | $0.3 \pm 0.2$                                  | 0.3                                                  | 4.4           |                   |
|                 |          |                                            | Post-monsoon | $0.6 \pm 0.4$                                  | $2.8 \pm 0.0$                                        | 5.9           | $0.7 \pm 0.7$                                  | $0.3 \pm 0.1$                                        | 5.4           |                   |
|                 |          |                                            | Winter       | $0.7 \pm 0.3$                                  | $2.6 \pm 0.3$                                        | 5.5           | $0.4 \pm 0.4$                                  | $0.2 \pm 0.2$                                        | 3.2           |                   |
|                 |          |                                            | Pre-monsoon  | $0.6 \pm 0.1$                                  | $2.5 \pm 0.9$                                        | 5.4           | $0.3 \pm 0.1$                                  | $0.2 \pm 0.0$                                        | 4.1           |                   |
| Lachung, Sikkim | 2700 m   | Eastern Himalayan region, India            | Spring       | $5.9 \pm 4.2$                                  | $1.5 \pm 0.6$                                        | $4.1 \pm 0.7$ | $9 \pm 4.6$                                    | $2.1 \pm 0.8$                                        | $5.2 \pm 1.8$ | Arun et al., 2024 |
|                 |          |                                            | Summer       | $1.7 \pm 0.5$                                  | $1.0 \pm 0.3$                                        | $4.1 \pm 1.8$ | $3.4 \pm 1.4$                                  | $1.4 \pm 0.5$                                        | $4.6 \pm 1.0$ |                   |
|                 |          |                                            | Autumn       | $2.4 \pm 1.1$                                  | $0.79 \pm 0.2$                                       | $4.8 \pm 1.5$ | $4.6 \pm 2.3$                                  | $1.0 \pm 0.4$                                        | $5.1 \pm 0.6$ |                   |
|                 |          |                                            | Winter       | $4.4 \pm 1.7$                                  | $0.75 \pm 0.2$                                       | $5.5 \pm 0.9$ | $7.4 \pm 1.8$                                  | $0.9 \pm 0.2$                                        | $6.3 \pm 1.5$ |                   |
| Lulang          | 3326 m   | Tibetal Plateau, China                     | Winter       | $1.04 \pm 0.25$                                | $0.75 \pm 0.13$                                      | $6.7 \pm 0.8$ | $1.47 \pm 0.51$                                | $0.71 \pm 0.16$                                      | $8.2 \pm 1.4$ | Zhu et al., 2018  |
|                 |          |                                            | Pre-monsoon  | $0.85 \pm 0.25$                                | $0.62 \pm 0.09$                                      | $6.6 \pm 0.6$ | $0.97 \pm 0.24$                                | $0.51 \pm 0.12$                                      | $8.4 \pm 0.9$ |                   |
|                 |          |                                            | Monsoon      | $0.38 \pm 0.09$                                | $0.32 \pm 0.07$                                      | $7.2 \pm 0.9$ | $0.67 \pm 0.17$                                | $0.27 \pm 0.06$                                      | $8.1 \pm 0.9$ |                   |

|                       |        |                                 |              |                 |                 |                 |                 |                 |                 |                        |
|-----------------------|--------|---------------------------------|--------------|-----------------|-----------------|-----------------|-----------------|-----------------|-----------------|------------------------|
|                       |        |                                 | Post-monsoon | $0.55 \pm 0.23$ | $0.44 \pm 0.14$ | $7.7 \pm 1.3$   | $1.09 \pm 0.15$ | $0.58 \pm 0.05$ | $8.0 \pm 1.0$   |                        |
| Bode (Kathmandu)      | 1300 m | Central Himalayan region, Nepal | Pre-monsoon  | $23.2 \pm 11.3$ | $1.4 \pm 0.2$   | $4.8 \pm 0.4$   | -               | -               | -               | Chen et al., 2020      |
|                       |        |                                 | Monsoon      | $11.5 \pm 7.79$ | $1.0 \pm 0.3$   | $4.2 \pm 0.6$   | -               | -               | -               |                        |
|                       |        |                                 | Post-monsoon | $17.0 \pm 10.1$ | $1.2 \pm 0.2$   | $4.9 \pm 0.3$   | -               | -               | -               |                        |
|                       |        |                                 | Winter       | $20.4 \pm 14.0$ | $1.5 \pm 0.2$   | $5.1 \pm 0.3$   | -               | -               | -               |                        |
|                       |        |                                 | Annual       | $17.5 \pm 12.2$ | $1.4 \pm 0.3$   | $4.6 \pm 0.8$   | -               | -               | -               |                        |
| ICIMOD site, Godavari | 1600 m | Central Himalayan region, Nepal | Winter       | -               | $1.05 \pm 0.21$ | $5.18 \pm 0.33$ | -               | -               | -               | Wu et al., 2019        |
|                       |        |                                 | Pre-monsoon  | -               | $0.59 \pm 0.16$ | $5.16 \pm 0.68$ | -               | -               | -               |                        |
|                       |        |                                 | Monsoon      | -               | $0.83 \pm 0.10$ | $5.31 \pm 0.18$ | -               | -               | -               |                        |
|                       |        |                                 | Post-monsoon | -               | $0.83 \pm 0.09$ | $5.35 \pm 0.40$ | -               | -               | -               |                        |
|                       |        |                                 | Annual       | -               | $0.77 \pm 0.23$ | $5.23 \pm 0.52$ | -               | -               | -               |                        |
| SETS (SE Tibet)       | 3326 m | Tibetan Plateau, China          | Summer       | -               | $0.27 \pm 0.10$ | $7.22 \pm 1.45$ | -               | $0.34 \pm 0.12$ | $5.53 \pm 1.04$ | Wu et al., 2020        |
|                       |        |                                 | Winter       | -               | $0.86 \pm 0.17$ | $5.92 \pm 0.43$ | -               | $0.59 \pm 0.44$ | $6.24 \pm 1.24$ |                        |
| Nam Co Lake           | 4730 m | Tibetan Plateau, China          | Pre-monsoon  | $0.22 \pm 0.05$ | $0.46 \pm 0.08$ | $6.57 \pm 0.56$ | -               | -               | -               | Zhang et al., 2017     |
|                       |        |                                 | Monsoon      | $0.09 \pm 0.05$ | $0.32 \pm 0.18$ | $5.91 \pm 2.14$ | -               | -               | -               |                        |
|                       |        |                                 | Average      | $0.15 \pm 0.08$ | $0.38 \pm 0.16$ | $6.19 \pm 1.70$ | -               | -               | -               |                        |
| Nainital              | 1950 m | Central Himalay region, India   | Winter       | $17.7 \pm 13.3$ | -               | -               | -               | -               | -               | Ram et al., 2010       |
|                       |        |                                 | Pre-monsoon  | $11.3 \pm 5.8$  | -               | -               | -               | -               | -               |                        |
|                       |        |                                 | Post-monsoon | $17.6 \pm 13.3$ | -               | -               | -               | -               | -               |                        |
| NCO-P, Khumbu valley  | 5079 m | Central Himalay region, Nepal   | Pre-monsoon  | $1.83 \pm 1.46$ | $0.72 \pm 0.15$ | $5.1 \pm 0.3$   | $2.86 \pm 2.49$ | $0.77 \pm 0.18$ | $3.9 \pm 0.5$   | Kirillova et al., 2016 |
|                       |        |                                 | Monsoon      | $0.21 \pm 0.22$ | $0.45 \pm 0.18$ | $4.2 \pm 0.6$   | $0.32 \pm 0.29$ | $0.51 \pm 0.15$ | $4.4 \pm 1.4$   |                        |
|                       |        |                                 | Post-monsoon | 0.3             | 0.36            | 5.6             | 0.72            | 0.65            | 3.3             |                        |
|                       |        |                                 | Winter       | $0.31 \pm 0.08$ | $0.61 \pm 0.08$ | $5.4 \pm 0.6$   | $0.61 \pm 0.20$ | $0.71 \pm 0.13$ | $3.8 \pm 0.8$   |                        |
| Lumbini               | 100 m  | Central Himalay region, Nepal   | Pre-monsoon  | -               | $1.81 \pm 0.34$ | $3.98 \pm 0.39$ | -               | -               | -               | Chen et al., 2020      |
|                       |        |                                 | Monsoon      | -               | $1.31 \pm 0.33$ | $4.75 \pm 0.60$ | -               | -               | -               |                        |
|                       |        |                                 | Post-monsoon | -               | $1.28 \pm 0.21$ | $4.37 \pm 0.88$ | -               | -               | -               |                        |
|                       |        |                                 | Winter       | -               | $1.41 \pm 0.46$ | $5.50 \pm 0.38$ | -               | -               | -               |                        |
|                       |        |                                 | Annual       | -               | $1.52 \pm 0.41$ | $4.47 \pm 0.74$ | -               | -               | -               |                        |
|                       |        | Western                         | Summer       | -               | $0.05 \pm 0.03$ | $0.59 \pm 0.36$ | -               | -               | -               |                        |

|                         |        |                                 |         |   |                 |                 |   |   |   |
|-------------------------|--------|---------------------------------|---------|---|-----------------|-----------------|---|---|---|
|                         |        | Himalayan region, India         | Winter  | - | $0.07 \pm 0.04$ | $0.36 \pm 0.47$ | - | - | - |
|                         |        |                                 | Average | - | $0.06 \pm 0.02$ | $0.47 \pm 0.16$ | - | - | - |
| Gangotri Gomukh glacier | 3415 m | Central Himalayan region, India | Summer  | - | $0.16 \pm 0.05$ | $1.61 \pm 0.66$ | - | - | - |
|                         |        |                                 | Winter  | - | $0.17 \pm 0.04$ | $1.44 \pm 0.35$ | - | - | - |
|                         |        |                                 | Average | - | $0.16 \pm 0.01$ | $1.53 \pm 0.12$ | - | - | - |
| Zemu glacier            | 2700 m | Eastern Himalayan region, India | Summer  | - | $0.12 \pm 0.03$ | $1.39 \pm 0.35$ | - | - | - |
|                         |        |                                 | Winter  | - | $0.11 \pm 0.01$ | $1.38 \pm 0.59$ | - | - | - |
|                         |        |                                 | Average | - | $0.12 \pm 0.01$ | $1.38 \pm 0.01$ | - | - | - |

**Table S7.** Cluster contribution to  $b_{\text{abs\_aq\_365}}$ ,  $\text{MAE}_{365}$ , and AE across seasons at 1000 m above ground level (AGL).

| <b>1000 m<br/>AGL</b>    | <b>(Local+ Regional)</b> |                                                                      |                                                        | <b>(Long range)</b> |                                                                      |                                                        |               |
|--------------------------|--------------------------|----------------------------------------------------------------------|--------------------------------------------------------|---------------------|----------------------------------------------------------------------|--------------------------------------------------------|---------------|
|                          | <b>Parameters</b>        | <b><math>b_{\text{abs}}</math><br/>(<math>\text{Mm}^{-1}</math>)</b> | <b>MAE<br/>(<math>\text{m}^2 \text{g}^{-1}</math>)</b> | <b>AAE</b>          | <b><math>b_{\text{abs}}</math><br/>(<math>\text{Mm}^{-1}</math>)</b> | <b>MAE<br/>(<math>\text{m}^2 \text{g}^{-1}</math>)</b> | <b>AAE</b>    |
| <b>Summer</b>            |                          | $2.8 \pm 1.1$                                                        | $0.7 \pm 0.3$                                          | $6.6 \pm 0.5$       | $2.5 \pm 0.8$                                                        | $1.1 \pm 0.5$                                          | $6.2 \pm 0.7$ |
| <b>Post-<br/>monsoon</b> |                          | $3.4 \pm 2.0$                                                        | $1.0 \pm 0.5$                                          | $6.6 \pm 0.3$       | $4.7 \pm 2.5$                                                        | $0.9 \pm 0.2$                                          | $6.4 \pm 0.3$ |
| <b>Winter</b>            |                          | $17.2 \pm 8.3$                                                       | $1.8 \pm 0.4$                                          | $6.0 \pm 0.1$       | $14.4 \pm 6.4$                                                       | $1.9 \pm 0.5$                                          | $5.9 \pm 0.2$ |

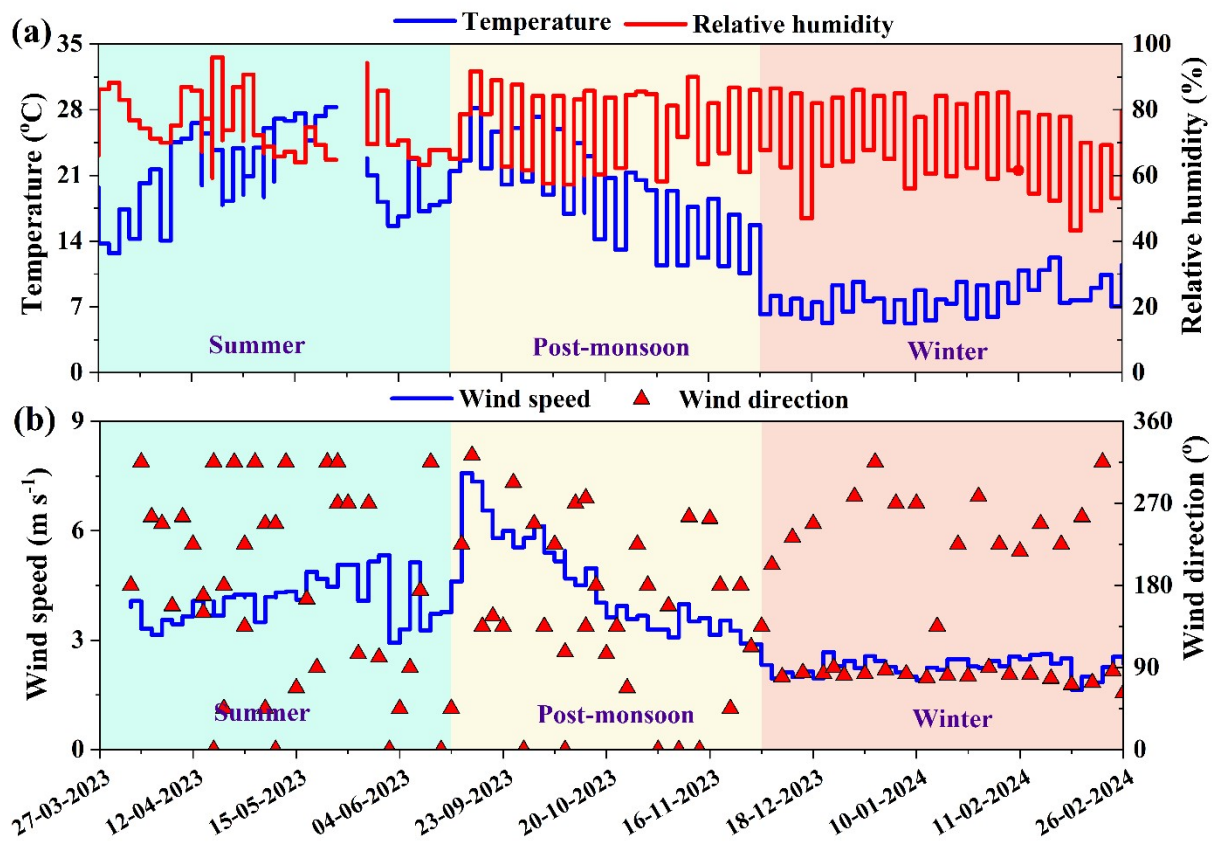

**Figure S1.** Time series of (a) temperature and relative humidity, and (b) wind speed and wind direction during the sampling period.

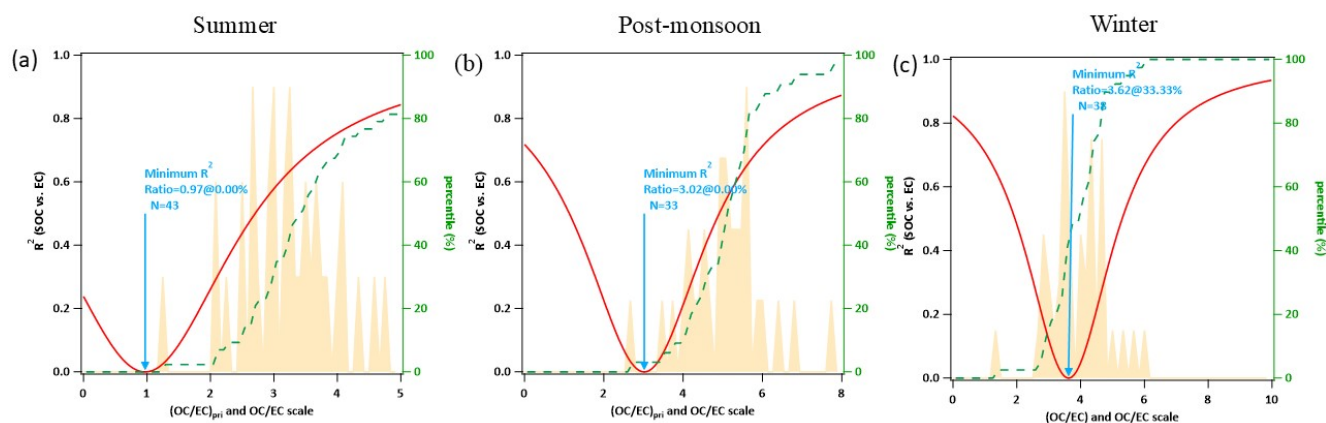

**Figure S2.** Determination of  $(OC/EC)_{pri}$  using the minimum  $R^2$  method (MRS) for (a) summer, (b) post-monsoon, and (c) winter. The red curve shows the coefficient of determination ( $R^2$ ) between SOC and EC as a function of assumed  $(OC/EC)_{pri}$ . The shaded area represents the frequency distribution of the OC/EC ratio for each season, and the green dashed curve is the cumulative frequency curve of the OC/EC ratio.

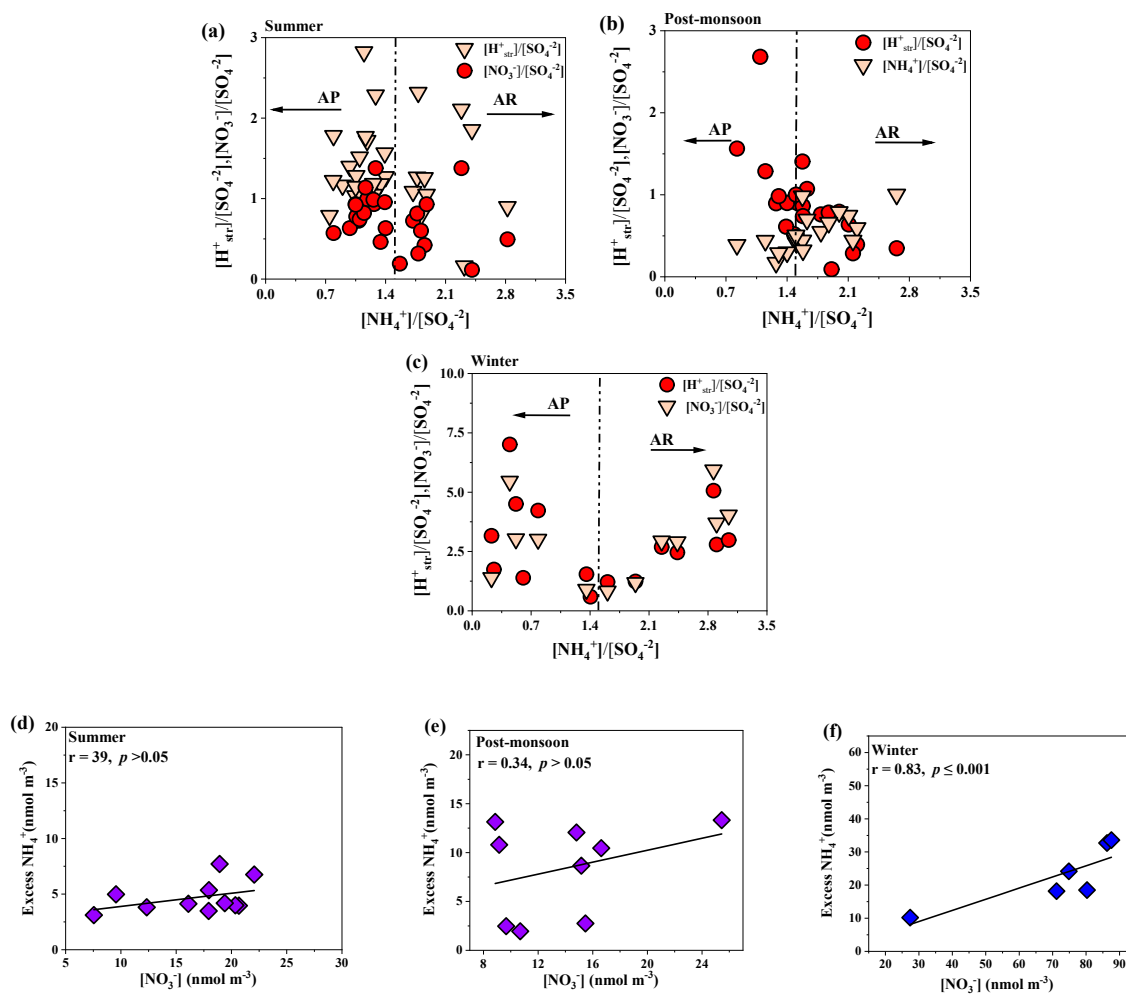

**Figure S3.** Scatter plots of  $[\text{H}^+_{\text{str}}]/[\text{SO}_4^{-2}]$  and  $[\text{NO}_3^-]/[\text{SO}_4^{-2}]$  vs  $[\text{NH}_4^+]/[\text{SO}_4^{-2}]$  for (a) summer, (b) post-monsoon season and (c) winter seasons. Associations between  $\text{NO}_3^-$  and excess ammonium for (d) summer, (e) post-monsoon season and (f) winter are also shown. Here,  $\text{H}^+_{\text{str}}$  refers to strong acidity, and is calculated as  $(2 \times \text{SO}_4^{2-} + \text{NO}_3^-) - \text{NH}_4^+$ .

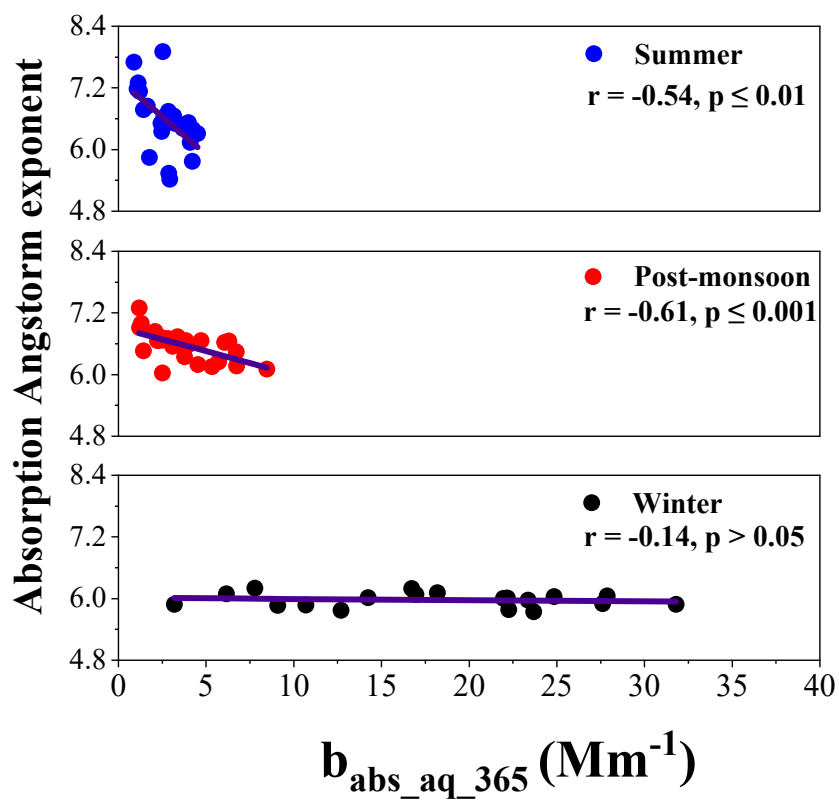

**Figure S4.** Correlation between  $b_{\text{abs\_aq\_365}}$  and Angstrom exponent.

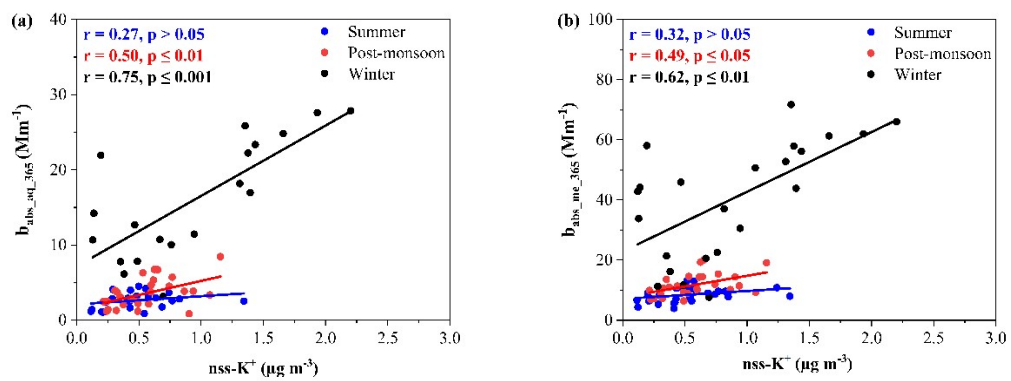

**Figure S5.** Correlation between  $\text{nss-K}^+$  and  $b_{\text{abs}_{365}}$  of  $\text{BrC}_{\text{aq}}$  (a) and  $\text{BrC}_{\text{me}}$  (b) for the three seasons.

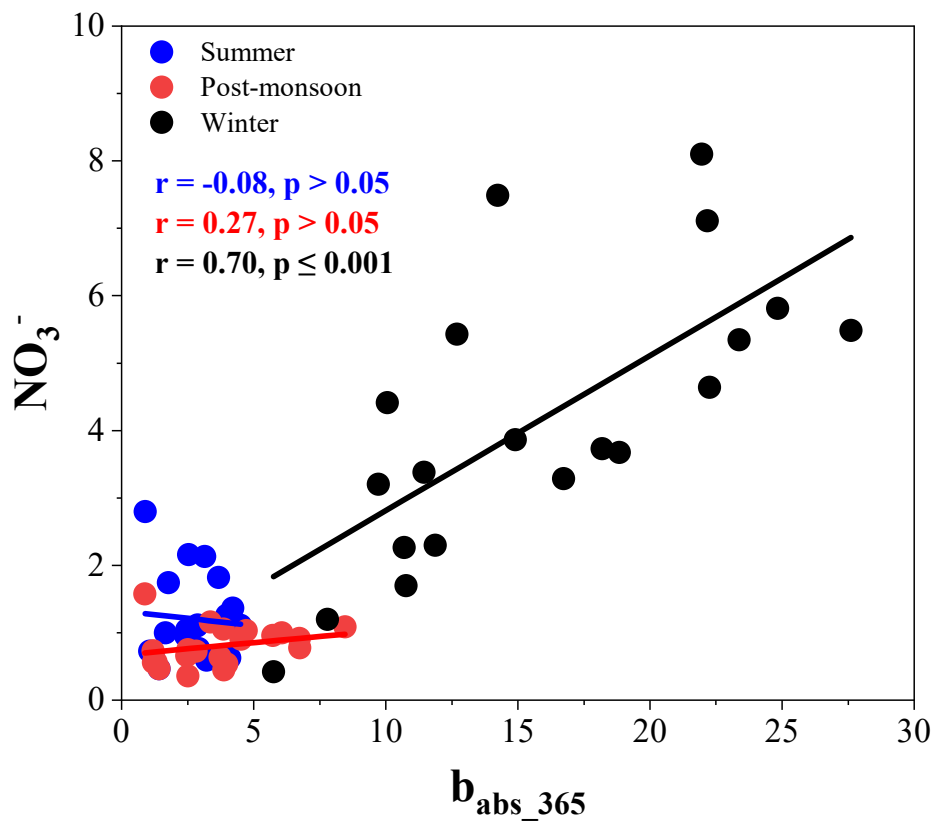

Figure S6. Correlation between  $b_{\text{abs\_aq\_365}}$  and  $\text{NO}_3^-$  for the three seasons.

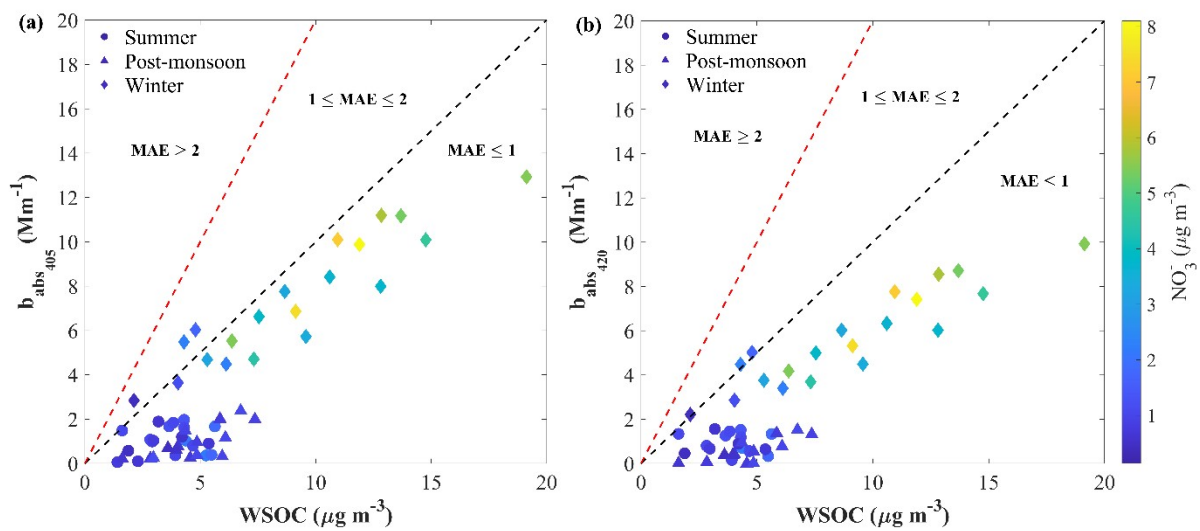

**Figure S7.** Scatter plot between WSOC and  $b_{\text{abs\_aq\_405}}$  (a) and WSOC vs  $b_{\text{abs\_aq\_420}}$  (b) across the seasons. The dashed black and red lines represent  $\text{MAE} = 1$  and  $\text{MAE} = 2$ , respectively.

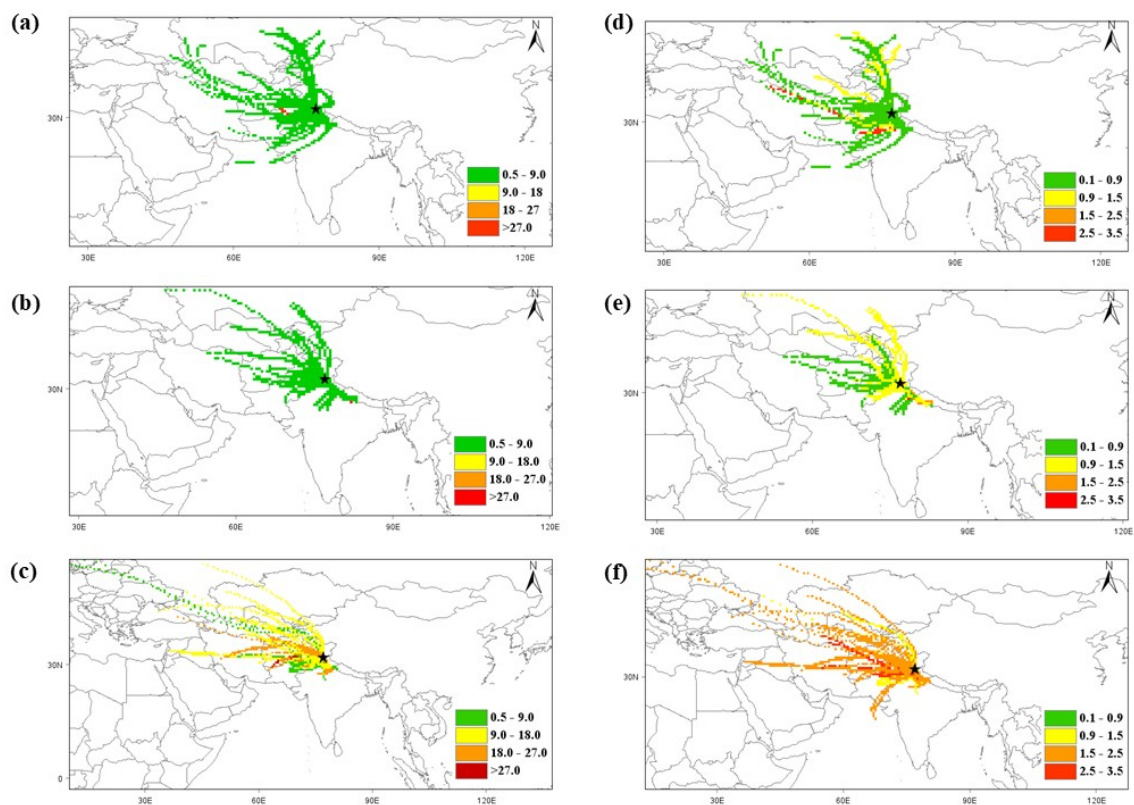

**Figure S8.** Concentration weighted trajectories (CWTs) of  $b_{\text{abs\_aq}_{365}}$  at 1000 m AGL for the summer (a), post-monsoon (b), and winter (c) seasons and  $\text{MAE}_{365}$  at 1000 m AGL for the summer (d), post-monsoon (e), and winter (f) seasons.

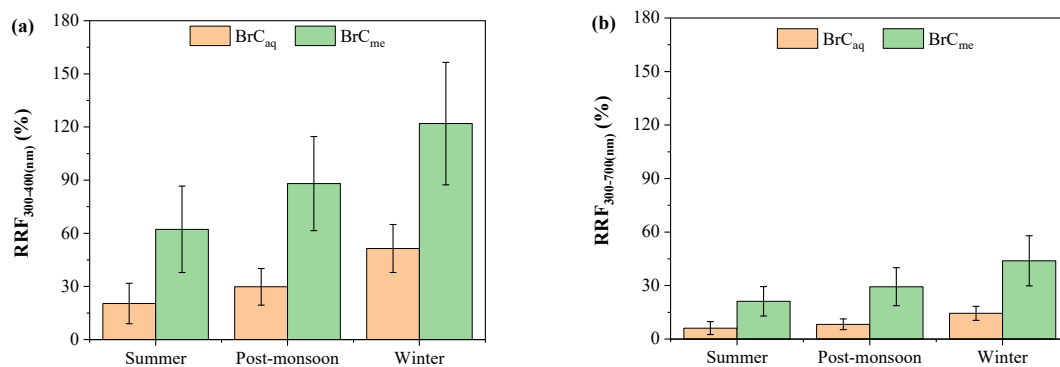

**Figure S9.** Relative radiative forcing for 300-400 nm wavelength range (a) and 300-700 nm wavelength range for BrC<sub>aq</sub> and BrC<sub>me</sub> across seasons.

## References

- Arun, B. S., Gogoi, M. M., Deshmukh, D. K., Hegde, P., Boreddy, S. K. R., Borgohain, A., & Babu, S. S. (2024). Enhanced light absorption by ambient brown carbon aerosols in the eastern Himalayas. *Environmental Science: Atmospheres*, 4(7), 782–801. <https://doi.org/10.1039/d4ea00021h>
- Chen, P., Kang, S., Tripathi, L., Ram, K., Rupakheti, M., Panday, A. K., Zhang, Q., Guo, J., Wang, X., Pu, T., & Li, C. (2020). Light absorption properties of elemental carbon (EC) and water-soluble brown carbon (WS-BrC) in the Kathmandu Valley, Nepal: A 5-year study. *Environmental Pollution*, 261. <https://doi.org/10.1016/j.envpol.2020.114239>
- Kirillova, E. N., Marinoni, A., Bonasoni, P., Vuillermoz, E., Facchini, M. C., Fuzzi, S., & Decesari, S. (2016). Light absorption properties of brown carbon in the high Himalayas. *Journal of Geophysical Research: Atmospheres*, 121(16), 9621–9639. <https://doi.org/https://doi.org/10.1002/2016JD025030>
- Ram, K., Sarin, M. M., & Hegde, P. (2010). Long-term record of aerosol optical properties and chemical composition from a high-altitude site (Manora Peak) in Central Himalaya. *Atmospheric Chemistry and Physics*, 10(23), 11791–11803. <https://doi.org/10.5194/acp-10-11791-2010>
- Verma, S. R., Pervez, S., Chow, J. C., Watson, J. G., Andrabi, S. M., Mandal, P., Khan, N. A., Tiwari, S., Chandra Dumka, U., Chakrabarty, R. K., Verma, M., Pervez, Y. F., Mishra, A., Tamrakar, A., Sowmya, H. N., Deb, M. K., Ghosh, K. K., Jain, V. K., Karbhal, I., ... Satnami, M. L. (2023). Optical Properties of Fine Mode Aerosols over High-Altitude Himalayan Glacier Regions. *ACS Earth and Space Chemistry*, 7(8), 1536–1544. <https://doi.org/10.1021/acsearthspacechem.3c00088>
- Wu, G., Ram, K., Fu, P., Wang, W., Zhang, Y., Liu, X., Stone, E. A., Pradhan, B. B., Dangol, P. M., Panday, A. K., Wan, X., Bai, Z., Kang, S., Zhang, Q., & Cong, Z. (2019). Water-

Soluble Brown Carbon in Atmospheric Aerosols from Godavari (Nepal), a Regional Representative of South Asia. *Environmental Science and Technology*, 53(7), 3471–3479. <https://doi.org/10.1021/acs.est.9b00596>

- Wu, G., Wan, X., Ram, K., Li, P., Liu, B., Yin, Y., Fu, P., Loewen, M., Gao, S., Kang, S., Kawamura, K., Wang, Y., & Cong, Z. (2020). Light absorption, fluorescence properties and sources of brown carbon aerosols in the Southeast Tibetan Plateau. *Environmental Pollution*, 257, 113616. <https://doi.org/10.1016/j.envpol.2019.113616>
- Zhang, Y. G., Xu, J. Z., Shi, J. Sen, Xie, C. H., Ge, X. L., Wang, J. F., Kang, S. C., & Zhang, Q. (2017). Light absorption by water-soluble organic carbon in atmospheric fine particles in the central Tibetan Plateau. *Environmental Science and Pollution Research*, 24(26), 21386–21397. <https://doi.org/10.1007/s11356-017-9688-8>
- Zhu, C. S., Cao, J. J., Huang, R. J., Shen, Z. X., Wang, Q. Y., & Zhang, N. N. (2018). Light absorption properties of brown carbon over the southeastern Tibetan Plateau. *Science of the Total Environment*, 625, 246–251. <https://doi.org/10.1016/j.scitotenv.2017.12.183>
- Zhu, C. S., Qu, Y., Huang, H., Shi, J. L., Dai, W. T., Zhang, N. N., Wang, N., Wang, L. Y., Ji, S. S., & Cao, J. J. (2024). Brown Carbon From Biomass Burning Reinforces the Himalayas and Tibetan Plateau Warming. *Geophysical Research Letters*, 51(9). <https://doi.org/10.1029/2023GL107269>
